# Supplementary material for: Method Development and validation in GC-MS/MS for analysis of pesticide residue in millet grains
Source: Research Square preprint supplement (doi:10.21203/rs.3.rs-3757518/v1), 2025-10-10
Supplement: Supplementary file 1 [file 35f7f98bcb3550a6367a5dea.docx]

**Table 1 : Composition, retention time, LOD, LOQ, R2, RSD and recovery of pesticides**

| **Pesticide** | **Composition** | **tR (min)** | **LOD(mg kg-1)** | **LOQ(mg kg-1)** | **R2** | **RSD (%)** | **Recovery (%)** |
| --- | --- | --- | --- | --- | --- | --- | --- |
| **Dimethoate** | C5H12NO3PS2 | 22.87 | 0.005 | 0.015 | 0.9979 | 6-8 | 86.60-89.45 |
| **Chlorpyrifos** | C9H11Cl3NO3PS | 29.33 | 0.005 | 0.015 | 0.9949 | 5-7 | 92.20-95.14 |
| **Profenofos** | C11H15BrClO3PS | 34.94 | 0.005 | 0.015 | 0.9987 | 8-10 | 90.14-93.25 |

tR : Retention time; LOD : Limit of detection; LOQ : Limit of quantification; R2 : correlation coefficient ; RSD : Relative Standard Deviation
